# Supplementary material for: Electrochemical etching of α-cobalt hydroxide for improvement of oxygen evolution reaction
Source: Royal Society of Chemistry journal article supplement (doi:10.1039/c6ta04078k), 2016-01-01
Supplement: c6ta04078k1.pdf [file c6ta04078k1.pdf]

## **Supporting Information**

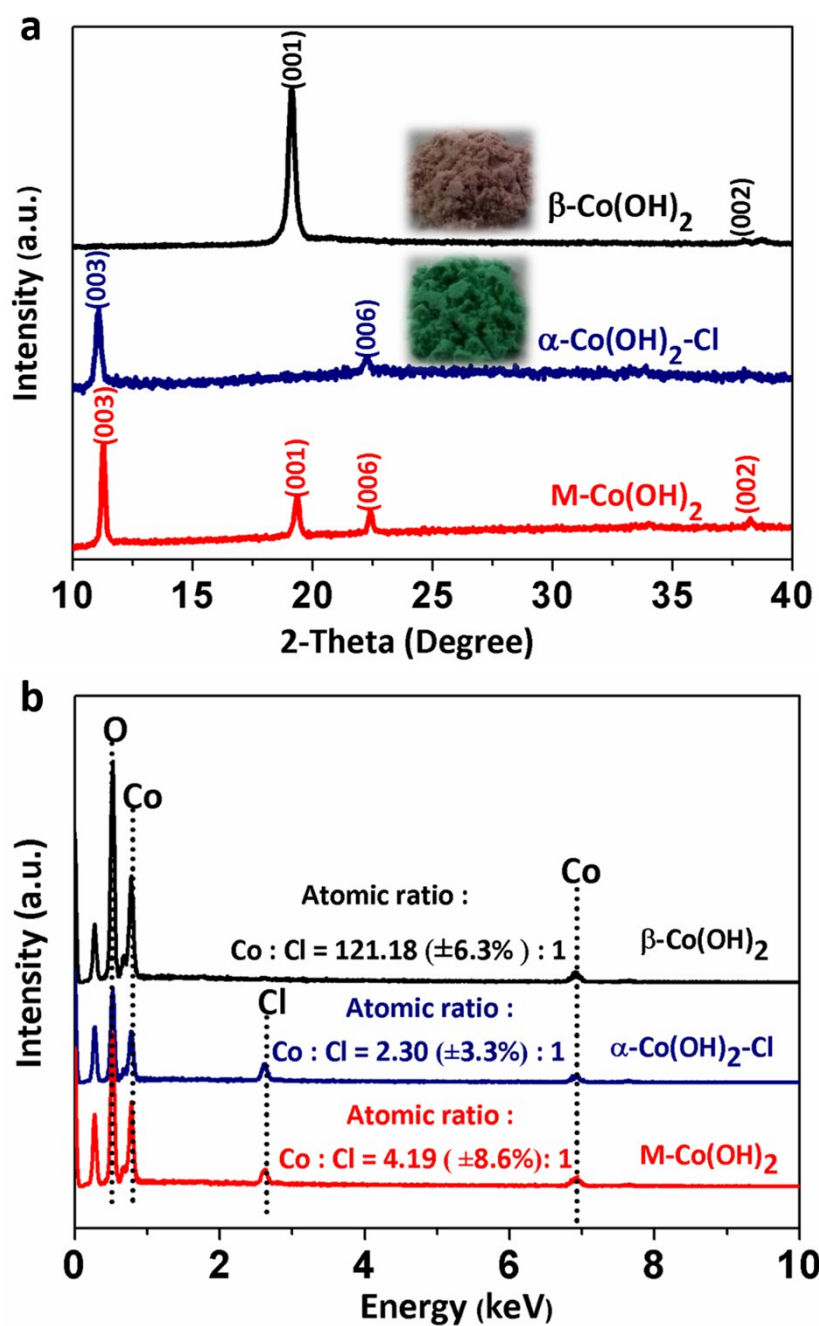

**Figure S1.** (a) XRD spectra of  $\beta$ -Co(OH)<sub>2</sub>,  $\alpha$ -Co(OH)<sub>2</sub>-Cl and M-Co(OH)<sub>2</sub>. The predominant 00 $l$  reflections of  $\alpha$ - and  $\beta$ -phase are indicated as subscripts  $\alpha$  and  $\beta$ , respectively. Insets of (a): the pink powders represent  $\beta$ -Co(OH)<sub>2</sub> and the green powders represent  $\alpha$ -Co(OH)<sub>2</sub>-Cl. (b) EDX spectra of  $\beta$ -Co(OH)<sub>2</sub>,  $\alpha$ -Co(OH)<sub>2</sub>-Cl and M-Co(OH)<sub>2</sub>, revealing different atomic ratios of Co : Cl.

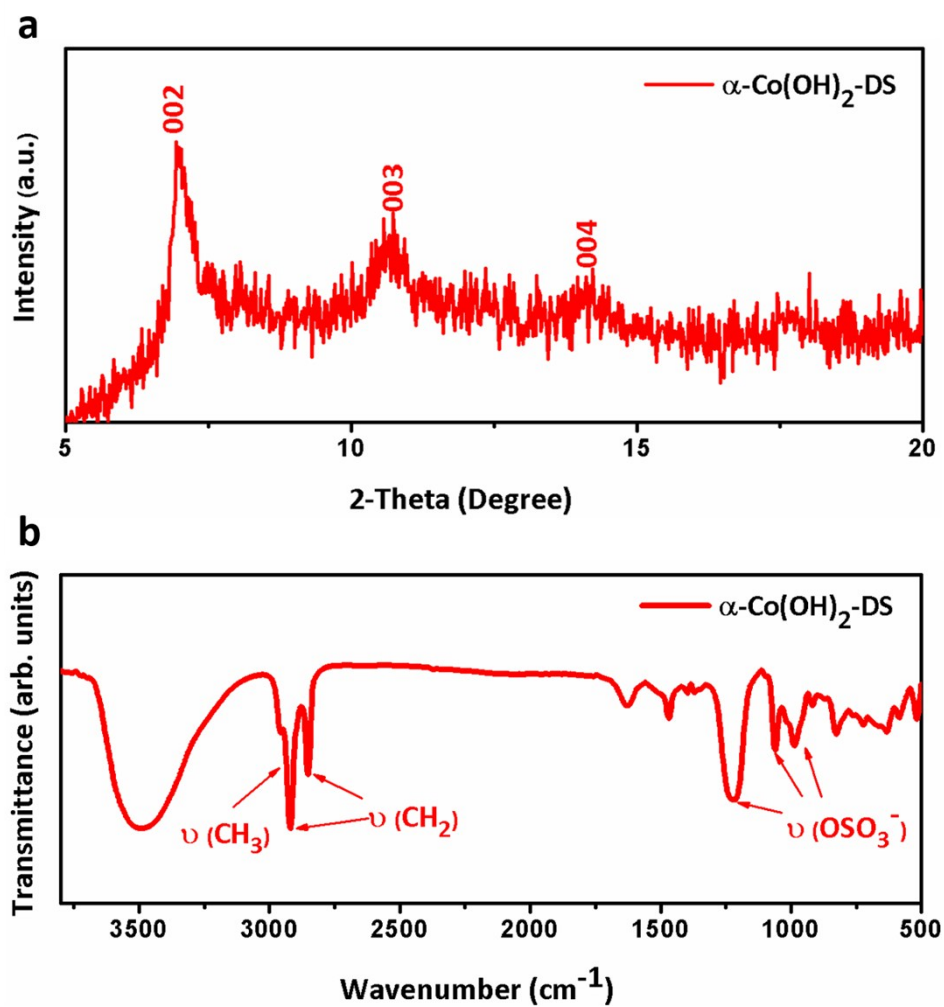

**Figure S2.** (a) XRD pattern of  $\alpha$ -Co(OH)<sub>2</sub>-DS, identifying the structure of  $\alpha$ -type Co(OH)<sub>2</sub>. (b) FT-IR spectrum of  $\alpha$ -Co(OH)<sub>2</sub>-DS, confirming the existence of dodecyl sulfate interlayer ions.

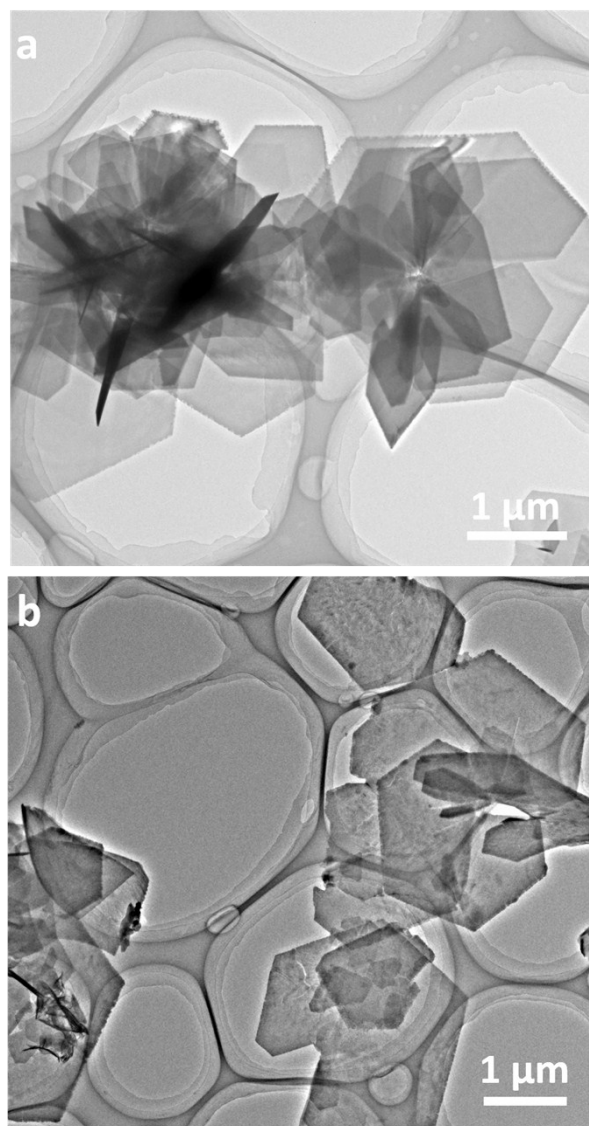

**Figure S3.** TEM images of  $\alpha$ -Co(OH)<sub>2</sub>-Cl (a) before OER test and (b) after OER test.

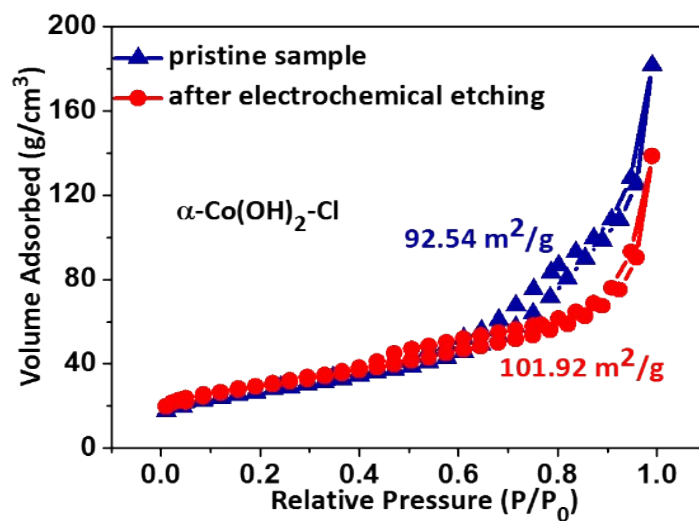

**Figure S4.** N<sub>2</sub> sorption isotherms of pristine and electrochemically etched  $\alpha$ -Co(OH)<sub>2</sub>-Cl.

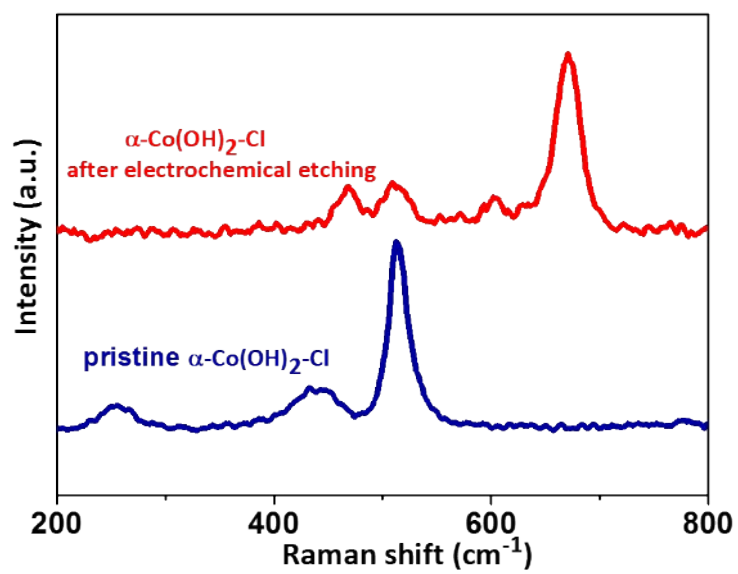

**Figure S5.** Raman spectra for the sample of  $\alpha\text{-Co(OH)}_2\text{-Cl}$  before and after OER electrolysis in 1.0 M KOH.

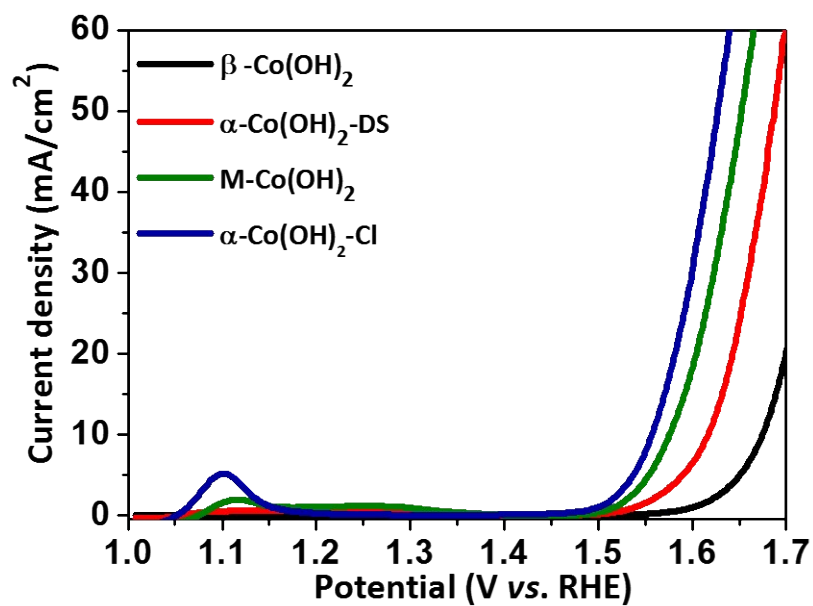

**Figure S6.** The polarization curves of  $\beta$ -Co(OH)<sub>2</sub>,  $\alpha$ -Co(OH)<sub>2</sub>-DS, M-Co(OH)<sub>2</sub> and  $\alpha$ -Co(OH)<sub>2</sub>-Cl, respectively.

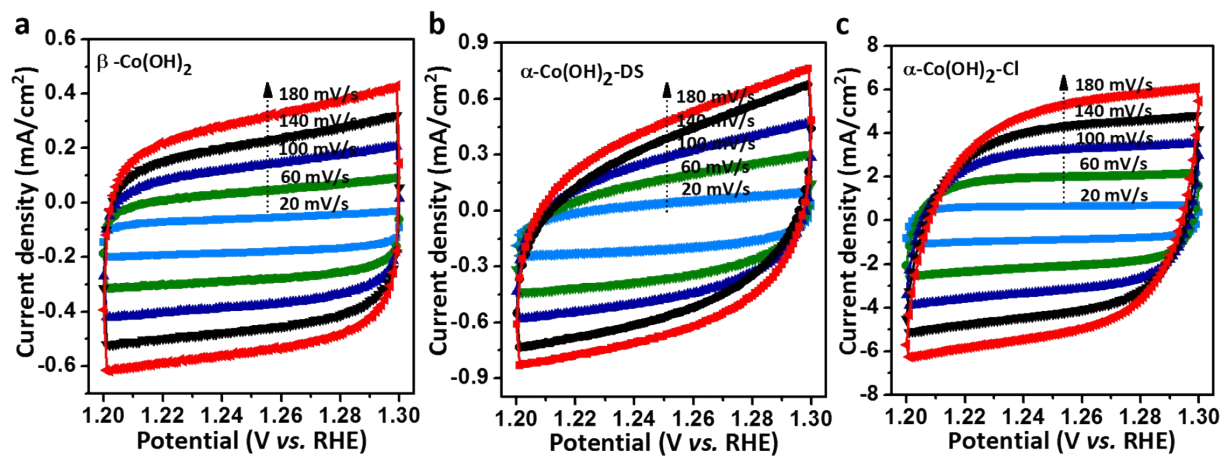

**Figure S7.** CVs at different scan rates in a potential window where no Faradaic processes occur (1.20 V ~ 1.30 V vs. RHE) for (a)  $\beta$ -Co(OH)<sub>2</sub>, (b)  $\alpha$ -Co(OH)<sub>2</sub>-DS and (c)  $\alpha$ -Co(OH)<sub>2</sub>-Cl, respectively.



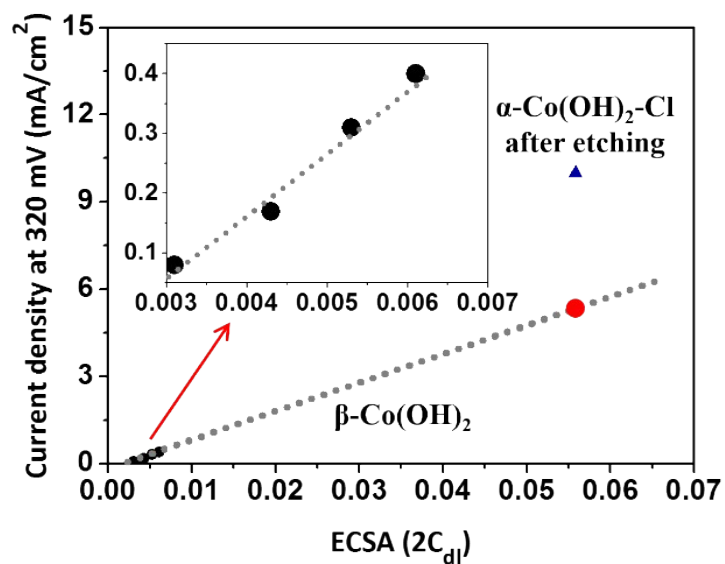

**Figure S8.** Current density at  $\eta = 320$  mV plotted against ECSA for the sample of  $\beta$ -Co(OH)<sub>2</sub>. Black solid sphere:  $\beta$ -Co(OH)<sub>2</sub> at different loadings; royal blue triangle:  $\alpha$ -Co(OH)<sub>2</sub>-Cl; red solid sphere: estimated activity of  $\beta$ -Co(OH)<sub>2</sub> with the same ECSA as  $\alpha$ -Co(OH)<sub>2</sub>-Cl.

**Table S1.** Comparison of ECSA and OER performance of  $\alpha$ -Co(OH)<sub>2</sub>-Cl and  $\beta$ -Co(OH)<sub>2</sub>.

| $\text{ECSA}_\alpha/\text{ECSA}_\beta$ | $j_\alpha/j_\beta$ at $\eta = 300$ mV | $j_\alpha/j_\beta$ at $\eta = 320$ mV |
|----------------------------------------|---------------------------------------|---------------------------------------|
| 12.98                                  | 44.44                                 | 58.82                                 |

**Table S2. Comparison of selected recently reported Co-based OER electrocatalysts in the basic electrolyte.**

| Catalysts (mg/cm <sup>2</sup> )                                                            | Electrolyte    | Onset potential (mV) | Overpotential at 10 mA/cm <sup>2</sup> (mV) | Tafel slope (mV/decade) | References                                                  |
|--------------------------------------------------------------------------------------------|----------------|----------------------|---------------------------------------------|-------------------------|-------------------------------------------------------------|
| Co <sub>3</sub> O <sub>4</sub> /C nanowires/Cu foil <sup>a</sup> (~0.2)                    | 0.1 M KOH      | 240                  | 290                                         | 70                      | <i>J. Am. Chem. Soc.</i> , 2014, <b>136</b> , 13925-13931.  |
| CoOOH (0.15)                                                                               | 1 M KOH        | /                    | 300                                         | 38                      | <i>Angew. Chem. Int. Ed.</i> , 2015, <b>54</b> , 8722-8727. |
| <b><math>\alpha</math>-Co(OH)<sub>2</sub>-Cl (0.2)</b>                                     | <b>1 M KOH</b> | <b>~240</b>          | <b>~320</b>                                 | <b>53</b>               | <b>this work</b>                                            |
| CoSe <sub>2</sub> (0.142)                                                                  | 0.1 M KOH      | /                    | 320                                         | 44                      | <i>J. Am. Chem. Soc.</i> , 2014, <b>136</b> , 15670-15675.  |
| Co <sub>3</sub> Fe <sub>7</sub> O <sub>x</sub> /NPC (0.36)                                 | 1 M KOH        | /                    | 328                                         | 31                      | <i>J. Mater. Chem. A</i> , 2016, <b>4</b> , 6048-6055.      |
| crumpled graphene-CoO (0.7)                                                                | 1 M KOH        | /                    | 340                                         | 71                      | <i>Energy Environ. Sci.</i> , 2014, <b>7</b> , 609-616.     |
| NiCo <sub>2.7</sub> (OH) <sub>x</sub>                                                      | 1 M KOH        | 250                  | 350                                         | 65                      | <i>Adv. Energy Mater.</i> , 2015, <b>5</b> , 1402031.       |
| CoMn-LDH (0.142)                                                                           | 1 M KOH        | /                    | 350                                         | 43                      | <i>J. Am. Chem. Soc.</i> , 2014, <b>136</b> , 16481-16484.  |
| CoCo-NS (0.07)                                                                             | 1 M KOH        | 307                  | 353                                         | 45                      | <i>Nat. Commun.</i> , 2014, <b>5</b> , 4477.                |
| CoP/C                                                                                      | 0.1 M KOH      | /                    | 360                                         | 66                      | <i>ACS Catal.</i> , 2015, <b>5</b> , 4066-4074.             |
| Ba <sub>0.5</sub> Sr <sub>0.5</sub> Co <sub>0.8</sub> Fe <sub>0.2</sub> O <sub>3-x</sub>   | 0.1 M KOH      | 314                  | ~362                                        | ~48                     | <i>Science</i> , 2011, <b>134</b> , 1383-1385.              |
| NG-CoSe <sub>2</sub> (0.2)                                                                 | 0.1 M KOH      | 293                  | 366                                         | 40                      | <i>ACS Nano</i> , 2014, <b>8</b> , 3970-3978.               |
| exfoliated NiCo LDH /carbon paper (0.08)                                                   | 1 M KOH        | /                    | 367                                         | 40                      | <i>Nano Lett.</i> , 2015, <b>15</b> , 1421-1427.            |
| reduced Co <sub>3</sub> O <sub>4</sub> (0.136)                                             | 1 M KOH        | 290                  | ~410                                        | 72                      | <i>Adv. Energy Mater.</i> , 2014, <b>4</b> , 1400696.       |
| SrNb <sub>0.1</sub> Co <sub>0.7</sub> Fe <sub>0.2</sub> O <sub>3-<math>\delta</math></sub> | 0.1 M KOH      | 260                  | 420                                         | 90                      | <i>Angew. Chem. Int. Ed.</i> , 2015, <b>54</b> , 1-6.       |
| $\beta$ -Co(OH) <sub>2</sub> /Ti <sup>a</sup>                                              | 1 M KOH        | 280-290              | 500-510                                     | /                       | <i>Chem. Mater.</i> , 2013, <b>25</b> , 1922-1926.          |
| Au/mCo <sub>3</sub> O <sub>4</sub>                                                         | 0.1 M KOH      | 300                  | 650                                         | 46                      | <i>ChemSusChem</i> , 2014, <b>7</b> , 82-86.                |

<sup>a</sup> catalysts directly grown on the conductive substrate.

<sup>b</sup> The table was built by the column of the overpotential that reaches to the current density of 10 mA/cm<sup>2</sup> in a descending order.

<sup>c</sup> All the catalysts not mentioned the substrate were dropped on GCEs.

**Table S3.** TOFs of  $\alpha$ -Co(OH)<sub>2</sub>-Cl pretreated at different potentials (calculated from current density at  $\eta = 320$  mV).

| <b>samples</b> | <b><math>j</math> at <math>\eta = 320</math> mV (mA/cm<sup>2</sup>)</b> | <b>TOF at <math>\eta = 320</math> mV (s<sup>-1</sup>)</b> |
|----------------|-------------------------------------------------------------------------|-----------------------------------------------------------|
| 1.0 V          | 4.2                                                                     | 0.0051                                                    |
| 1.3 V          | 10                                                                      | 0.0121                                                    |
